# Supplementary material for: Efficient generation of locus-specific human CAR-T cells with CRISPR/cCas12a
Source: PubMed Central journal article supplement — STAR Protoc. 2022 Apr 14;3(2):101321. doi: 10.1016/j.xpro.2022.101321 (PMC9038777; doi:10.1016/j.xpro.2022.101321), 2022-04-14
Supplement: mmc1.pdf [file mmc1.pdf]

**Data S1. Plasmid map, related to step 1 and step 4 in “Step-by-step method details”.**

**pUltra-CNF**

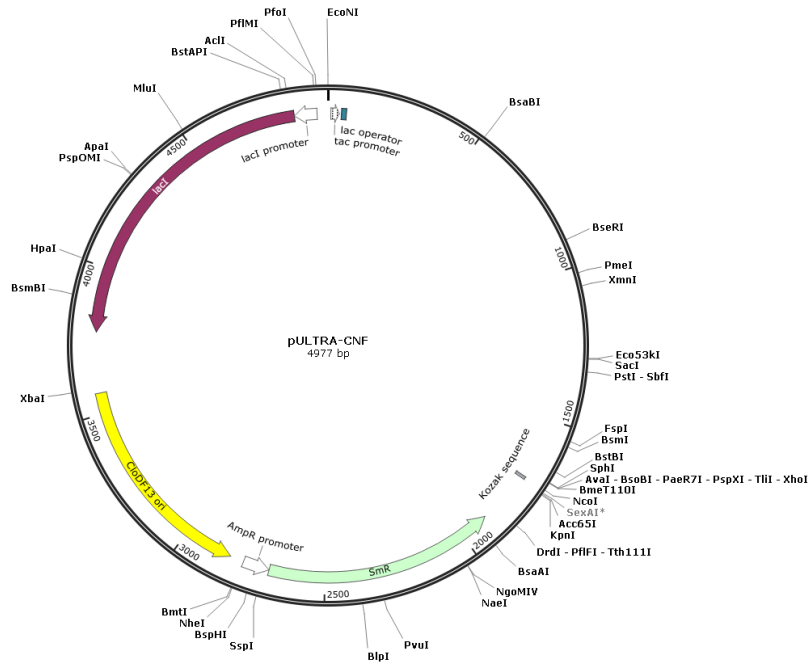

tagggagctgttgacaattaatcatcggctcgtataatgtgtggaattgtgagcggataacaattcacaaggaggtgcggccgatgg  
 acgaattgaaatgataaagagaaacacatctgaattatcagcggaggaagagtaagagaggtttaaaaaagatgaaaaatctgctc  
 tgataggtttgaaacagtggtaaaatacatttagggcattatctccaaataaaaaagatgattgattacaaaatgctggattgataat  
 tatagtttggctgattcatatgcctattaaaccagaaggaggttgatgagattagaaaaataggagattatacaaaaaagttttga  
 agcaatggggtaaaaggcaaaatattttatggaagtgaatggatgcttgataaggattatacactgaatgctatagattggctttaaaa  
 ctaccttaaaaagagcaagaaggagatggaacttatagcaagagaggatgaaaatcacaagggtgctgaagtattctatccaataatgc  
 aggttaatggtgctcattatcttggcgttgatgtgcagttgggggatggagcagagaaaaatacacatgttagcaaggagcttttacc  
 aaaaaaggttgtttattcacaacctgtctaacgggttggatggagaaggaaagatgagttctcaaaagggaattttatagctgtg  
 atgactctcagaagagattagggttaagataaaagcactactgccagctggagttgtaaggaaatccaataatggagatagct  
 aaactctctgaaatcttaccataaaaaggccagaaaaattggggagattgacagftaatagctatgaggagttagagagttta  
 ttaaaaaaagggaattgcatccaatggatttaaaaaatgctgtagctgaagaactataaagattttagagccaattagaagagattataa  
 gggcccgctttaaaccgctccagcttggctgtttggcggatgagagaagatttcagcctgatacagattaatcagaacgcagaag  
 cggctgataaaacagaattgcttggcggcagtagcgcggtggtccacctgacctgaccatgccgaactcagaagtgaacgccgtag  
 cggcagtgtagtggtgggtctccccatgcgagagtagggaaactgccagcatcaataaaacgaaaggctcagtcgaaagactgg  
 gccttgttggtagctcccggatcaatcatccccataatcctgttagcctgcagtaattccgcttcgcaacatgtgagcaccggttat  
 tgactaccggaagcagtgtagcctgtcttcaaatgcctgaggccagttgctcaggctcctcccgtggagtaataattgacgata  
 tgatcagtgacggtaactaagcggcctgctgacttctcggcatcaaaaggcatttctattaaaggattgacgagggcgatctg  
 cgcagtaagatgcccccgattccggcggtagttcagcagggcagaacggcggactctaaatccgcatggcaggggttcaaatcc  
 cctccggcggaccaaatcgaaaagcctgctcaacgagcaggctttttgcatgctcagcagctcagggtcgaatttgccatggcggc  
 caccaggtaccaccggcgcctcaggcattgagaagcacacggtcacactgctccggtagtcaataaacggtaaacagcaatag  
 acataagcggctatttaacaccctgcctgaaccgacgaccgggtcatcgtggccgatcttgggcccctcggctgaacgaattgt  
 tagacattatttgcgactacctgtgatctgccttctcagtagtggaacaaatttccaactgatctgcgcgcgaggccaagcagctt  
 ctcttgcacaagataagcctgtctagcttcaagtagacgggctgatactgggcccagggcgtccattgccagtcggcagcgaca  
 tcctcggcgcgatttggcggttactgcgctgtacaaatgcccggacaacgtaagcactacatttctcctcagcagccagctggggc  
 ggaggtccatagcgttaagggttcatfttagcgcctcaaatagatcctgttcagggaaccgatcaagagttctccgccgctggacct  
 accaaggcaacgctatgttcttctgtttgtcagcaagatgccagatcaatgtcagctgtggctggtcgaagatactgcaagaatgt  
 cattgcgctgccattctcaaatgagttcgcgcttagctggataaccacggaatgatgtcgtcgtgcacaacatggtgacttctac  
 agcgcggagaatctcgtctctccaggggaagccgaagttccaaaagctggtgatcaagctcggcgttgttcatcaagccttac

ggtcaccgtaaccagcaaatcaatatactgtgtgcttcaggccgccatccactgcggagccgtacaatgtacggccagcaacgtc  
 ggttcgagatggcgtcgtgatgacccaactacctctgatagttgagtcgatactcggcgatcaccgctccctcatactctctcttttcaa  
 tattattgaagcattatcagggttattgtctcatgagcggatacatattgaaatgatttagaaaaataaacaatagctagctcactcggtc  
 gctacgctccggggtgagactgcggcggcgctgcggacacatacaaaagttaccacagattccgtggataagcaggggactaac  
 atgtgaggcaaaacagcagggccgcggcgggtggtcttttccataggtccgccctcctgccagagttacataaacagacgcttttcc  
 ggtgcatctgtgggagccgtgaggtcaacctgaactctgacagtacgggcgaaccggacaggactaaagatccccaccgtttcc  
 ggcgggtcgtccctcttgcgtctcctgttccgacctgcggttaccggatactgttccgcctttctcccttacgggaagtgtggcgt  
 ttctcatagctcacactggatctcggctcgggtgtaggtcttccgctcaagctgggctgtaagcaagaactccccgttcagcccac  
 tgcctgccttatccggttaactgtcacttgagccaaccggaaaagcacggtaaacgccactggcagcagccattgtaactggg  
 agttcgcagaggattgttagctaaacacgcgggtgctctgaagtgtgcgcaaaagtcggctacactggaaggacagattgtgtgc  
 tgtgctctgcgaaagccagttaccacggttaagcagttcccaactgacttaacctcgcataaaccacctccccaggtgtttttcgttta  
 cagggcaaaagattacgcgcgaaaaaaaggtatcaagaagatcctttgatcttttactgaaccgctctagatttcagtgcaattatc  
 tctcaaatgtagcacctgaagtcagccccatagataaagttgtaattctcatgttagtcatgccccgcgccaccggaaaggagctga  
 ctgggtgaaggctcctcaagggtcaggtcagatccgggtcctaatagtgagtaactacattaattgcgttcgctcactgccc  
 ctftccagtcgggaaacctgtcgtgccagctgcattaatgaatggccaacgcgcggggagagggcgtttgcgtattggcgccagg  
 gtggttttttccaccagtgcagcggcaacagctgattgcccttaccgctgcccctgagagagttgcagcaagcgggtccacgctg  
 gtttccccagcagggcaaaactctgttgatggtggttaacggcgggatataacatgagctgtcttcgggtatcgtcgtatcccactaccg  
 agatgtccgcaccaacgcgcagcccggactcggtaatggcgcgattgcgccagcggccatctgacgttggaaccagcatcgc  
 gtgggaacgatgccctcattcagcattgcatggttggtaaaaccggacatggcactccagtcgcttcccgttccgctatcggctgaa  
 ttgattgcgagtgagatattatgccagccagccagacgcagacgcgccgagacagaactaatgggcccgtaacagcgcgatttgc  
 ctggtgaccaatgcgaccagatgctccacgccagtcgctaccgtctcatgggagaaataataactgttgatgggtgtctgtgctcag  
 agacatcaagaaataacgccggaacattagtcagggcagctccacagcaatggcactctgtcatccagcggatagttaatgatcag  
 cccactgacgcgttgcgcgagaagattgtcaccgccgctttacaggtctgacgcccttcttaccatcgcaccaccacgctgg  
 caccagttgatcggcgcgagatttaacgccgcgacaatttgcagcggcgcgtgcagggccagactggaggtgcaacgccaatc  
 agcaacgactgttggccgagttgttgcacgcggtgggaatgaattcagctccgccatcggcgttccacttttcccgcgttt  
 cgcgaaacgtggctggtcgttccaccgcgggaacggctgataagagacaccggcatactctgcgacatcgtataacgttact  
 ggtttacattaccacctgaattgactcttccgggcgtatcatgccataccggaaaggttttgcgccattcgtatggttccgggat  
 ctgcagctcctcccttatgcgactcctgcat

**pET22B-AsCas12a-2C-NLS**

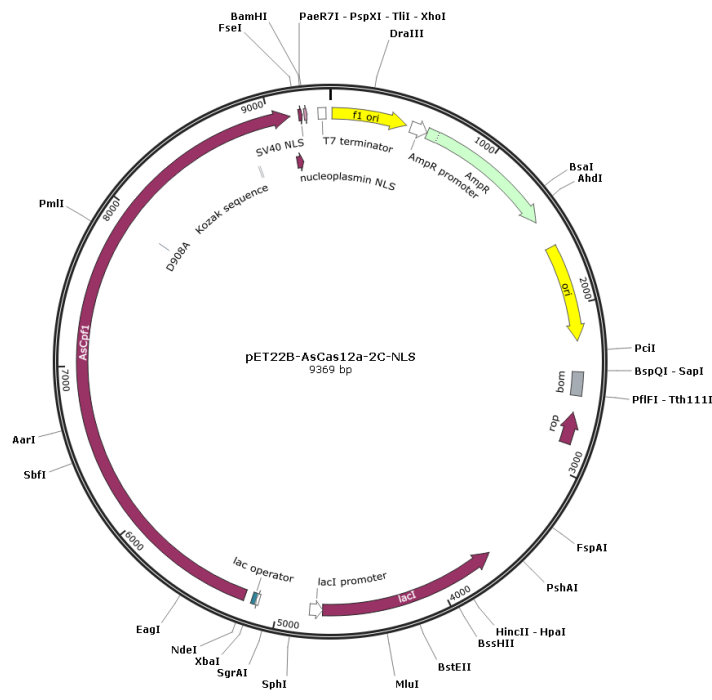

tgcgaaatgggacgcgccctgtagcggcgcattaagcgcggcgggtgtggtgttacgcgcagcgtgaccgctacacttccagcg

ccctagcggcccgtcctttcgtttctcccttcttctcggcacgttcggcggtttccccgtcaagctctaaatcgggggctccctttag  
ggttccgatttagtgccttacggcacctcgacccccaaaaaacttgattagggtgatggttcacgtagtggccatcggcctgatagacgg  
ttttcggccttgacgttgagtcacgttcttaataagtgactctgttccaaactggaacaactcaaccctatctcggctattctttg  
atftaagggttttccgattcggcctattggttaaaaaatgagctgattfaacaaaaatfaacgcgaatftaacaaaatfaacgttt  
acaattcaggtggcacttttggggaaatgtgcgcggaaacctatttgttttttaataacattcaaatatgtatccgctcatgagac  
aataacctgataaatgctcaataatgaaaaaggaagatgatgattcaacattccgtgctgcacctattcccttttttgcggcattt  
tgcctcctgttttctcaccagaacgctggtgaaagtaaagatgctgaagatcagttgggtgcacgagtggttacatcgaactg  
gatctcaacagcggtaagatccttgagagtttgcggcgaagaacgtttccaatgatgagcacttttaagttctgctatgtggcgggt  
attatcccgtattgacggggcaagagcaactcggctgccgatacactattctcagaatgactggtgagtactaccagtcacaga  
aaagcatctfacggatggcatgacagtaagagaattatgcagtctgccataacctgagtataacactcggccaacttactctgac  
aacgatcggagaccgaaggagtaaccgctttttgcacaacatgggggatcatgtaactcggctgatcgttgggaaccggagctg  
aatgaagccatacacaacgacgagcgtgacaccacgatcctgcagcaatggaacaacgttgcgcaactattaactggcgaacta  
cttactctagctcccggcaacaattaatagactggatggaggcggataaagttgcaggaccacttctgcgctcggccctccggctgg  
ctggtttattgctgataaatctggagccggtgagcgtgggtctcgcggtatcattgcagcactggggccagatggttaagccctccgctat  
cgtagtattctacacgacggggagtcaggcaactatggatgaacgaatagacagatcgtgagataggtgctcactgattaagcatt  
ggtaactgtcagaccaagtctactatatactttagattgatttaaaactcatttttaattaaaaggatctaggtgaagatccttttgataa  
tctcatgacaaaatcccttaacgtgagtttctcactgagcgtcagaccccgtagaaaagataaagatcttctgagatccttttt  
ctgcgctaatctgctgcttcaacaaaaaacaccgctaccagcgggtggttgttgcgggatcaagagctaccaactcttttccga  
aggtaactggctcagcagagcgcagatacacaatactgtcctctagttagccgtagttaggccaccactcaagaactctgtagc  
cgctacatactcgtctgtaactctgttaccagtggctgctgccagtggcgataagtcgtgcttaccgggtggactcaagacgata  
gttaccggataaggcgcagcggctgggctgaacgggggggtctgacacagcccagcttggagcgaacgacctacaccgaactg  
agatactacagcgtgagctatgagaaagcggcagctcccgaaggagaaagggcggacaggtatccggtaagcggcagggctg  
gaacaggagagcgcagcagggagcttccaggggaaacgctggtatcttatagctctcgggttccacctctgactgagc  
tcgattttgtgatgctcgcagggggggagcctatggaaaaacggcgaacgcggccttttacggttctggccttttctggcct  
ttgctcacatgttcttctgcttatcccctgattctgtgataaccgattaccgctttagtgagctgataccgctcggcgcagccga  
acgaccgagcgcagcagtgagcaggaagcggagagcgcctgatgcgggtattttctcttacgcatctgtcgggtatttca  
accgcatataggtgactctcagtaaatctgctctgatgccatagtaagccagatatacctccgctatcgtactgactgggtcat  
ggctgcggcccgcacccgccaacaccgctgacgcgcctgacgggcttctgctcccggcatccgcttacagacaagctgtgac  
cgtctccgggagctgcatgtgacagagtttaccgctaccgaaacgcgcgaggcagctgcggtaagctcatcagcgtgctc  
tgaagcattcacagatgctgcttctatccgcgtccagctcgttgaatttccagaagcgttaatgctggttctgataaagcggg  
catgttaaggcgggttttctggttactgatcctccgtgaaggggatttcttcatgggggtaatgataccgatgaaacgag  
agaggatgctcacgatacgggttactgatgatgaacatgcccgttactggaacgttgtgaggtaacaactggcggatggatcgc  
gaggaccagagaaaaactcagggcaatgccagcgttctgtaatacagatgtaggtgtccacagggtagccagcagcctc  
gcatgagatccggaacataatggtgagggcgtgacttccggttccagactttacgaaacacggaaaccgaagaccattcat  
ttgtgctcaggtcgcagacgtttgcagcagcagctcgttccgctcgcgctatcgggtattctgtaaccagtaaggcaacc  
ccggcagcctagccgggtcctcaacgacaggagcagatcatgcgaccccgtggggccgcatcgggcgataatggcctgcttct  
cgccgaaacgttgggtggcgggaccagtgacgaaggctgagcagggcgtgcaagattccgaataccgcaagcagcagccgat  
catcgtcgcgtccagcgaagcggctcctcggcaaatgaccagagcgtcggcggcacctgcttacgagttgcatgataaagaa  
gacagtataagtgcggcgcagatagtcacccccgcccaccggaaggagctgactgggtgaaagctcaagggcactcgtc  
gagatcccgggtcctaagtgtgagtaactacattaattgcgttgcgctcactgcccgttccagtcgggaaacctgtcgtgccagct  
gcattaatgaatggccaacgcgcggggagagggggttgcgtattggcgccaggggtgttttctttaccagtgagacgggcaa  
cagctgattgccttaccgctggcctgagagagttgagcaagcgggtccacgctggtttccccagcagggcaaaatcctgtttga  
tggtggttaacggcgggatataacatgagctgtctcggatcgtcgtatcccactaccgagatataccgaccaacgcgcagcccggac  
tcggtaatggcgcgacttgcggcagcggcatctgacgttggcaaccagcagcagtggaacgatgccctcattcagcatttgc  
ggtttgtgaaaaccggacatggcactccagtcgcttccgctatcggctgaatttgattgcgagtgagatattatgccagcca  
gccagacgcagacgcggagacagaactaatgggcccgtaacagcgcgatttgcgtggtgacccaatgcgaccagatgctccac  
gcccagtcgctaccgttctatgggagaaaataactgtgatgggtgctggtcagagacatcaagaaataacggcgaacattag  
tgcaggcagctccacagcaatggcatcctggtatccagcggatagtaatgatcagcccactgacgcgttgcgcgagaagattgtc  
accgccgtttacaggctcgcacccgcttcttaccatcgaaccaccacgctggcaccagttgatcggcgcgagatttaacgc  
cgcgacaatttgcagcggcgcgtcagggccagactggaggtggaacgcaatcagcaacgactgtttcccggcagttgtgctc  
cacgcggtgggaatgtaattcagctccgcatcggcgttccacttttcccggcttttcgagaaacgtggctggcctggttaccacg

cgggaaacggctgataagagacaccggcactctgcgacatcgataacgtfactggtttacattaccacctgaattgactctctt  
ccggcgctatcatgccataaccgaaaggtttgcccattcgatgggtccggatctcgacgctctcccttatcgactcctgcatta  
ggaagcagcccagtagtaggttgaggccgttgagcaccgccgccaaggaatggatgcatgcaaggagatggcgccaacagtcc  
ccggccacggggcctgccaccatacccacggcaacaagcgtcatgagcccgaagtggcgagcccgatctccccatcggtg  
atgtcggcgatagggcggcagcaaccgcacctgtggcggcggatgcccggccacgatgcgtccggcgtagaggatcgagatctc  
gatcccgcgaaataatcactactataggggaattgtgagcgggataacaattcccctctagaataaattttttaactttaagaagga  
gatatacatatgacacagttcagggtttaccaacctgtatcaggtgagcaagacactcgggttgagctgatcccacagggaagac  
cctgaagcacatccaggagcagggttcacgaggaggacaaggcccgaatgatcactacaaggagctgaagcccatcctgac  
ggatctacaagacctatgccgaccagtgcctgcagctggtgcagctgattgggagaacctgagcggccatcgactcctatagaa  
aggagaaaaccgaggagacaaggaacgccctgatcgaggagcaggccacatacgaatgccatccacgactactcctgcccg  
gacagacaacctgaccgatccatcaataagagacacgccgagatctacaagggcctgttaagggcagctgtttaatgcaaggt  
gctgaagcagctggcaccgtgaccacaaccgagcagagaacgccctgctgcggagcttcacaagttacaacctacttccgg  
ctttatgagaacaggaagaacgtgttcagcggcaggatatacagacagccatcccacaccgcatcgtgcaggacaactccccaa  
ttaaggagaattgcacatctcacacgctgatcaccgccgtgccagcctgcgggagcactttgagaacgtgaagaagccatcg  
gcatctcgtgagcactccatcgaggaggtgtttcctccctttataaccagctgctgacacagaccagatcgacctgataaccag  
ctgctgggagggaatctctcgggaggcaggcaccgagaagatcaaggcctgaacgaggtgctgaatctggccatccagaagaatga  
tgagacagcccacatcctgcctccctgccacacagatcctcccctgtttaagcagatcctgtccgataggaacacctgtcttcac  
ctggaggagttaagagcagcagggaagtatccagctctctgcaagtacaagacactgctgagaacgagaacgtgctggagaca  
gccgaggccctgtttaacgagctgaacagcctgacctgacacacatctcagccacaagaagctggagacaatcagcagcggc  
ctgtgcgaccactgggatacactgaggaaatgccctgtatgagcggagaatctccgagctgacaggcaagatccaagtctgccaag  
gagaaggtgcagcgcagcctgaagcacgaggatataacctgcaggagatcctctgcccagggcaaggagctgagcaggccct  
tcaagcagaaaaccagcagatcctgtcccacgcacacgccgccctggatcagccactgctacaacctgaagaagcaggagga  
gaaggagatctgaagtctcagctggacagcctgctggcctgtaccactgctggactggttggcgtggatgagccaacgaggtg  
gaccccagttctctcccggctgaccggcatcaagctggagatggagccttctgagcttctacaacaagccagaattatgccac  
caagaagccctactcctgggagaagtcaagctgaactttcagatgcctacactggcctctggctgggacgtgaataaggagaagaac  
aatggcgccatcctgtttgtgaagaagcctgtactatctgggcatatgccaaagcagaaggcaggtataaggccctgagcttcg  
agcccacagagaaaaccagcagggcctttgataagatgtactatgactactcctgatgccccaagatgatcccaagtgcagcac  
ccagctgaaggcctgacagcccactttcagaccacacaacccccatcctgctgccaacaatttcacgagcctctggagatcaaa  
aggagatctacgactgaacaatcctgagaaggagccaaagaagttcagacagcctacgccaagaaaaccggcgaccagaaggg  
ctacagagaggccctgtgcaagtggatcacttcacaagggatttctgtccaagtataccaagacaacctctatgatctgctagcctg  
cggccatctctcagataaaggacctggcgagctactatgccgagctgaatcccctgctgtaccacatcagcttcagagaatcggca  
gaaggagatcatggatgccgtggagacaggcaagctgtacctgtccagatctataacaaggactttgccaaggccaccacggcaa  
gcctaactgcacacactgtattggaccggcctgtttctccagagaacctggccaagacaagcagatcaagctgaatggccaggccgag  
ctgttctaccgccctaagtcagatgaagaggatggcacaccggcctgggagagaagatgctgaacaagaagctgaaggatcagaa  
aacccaatccccgacacctgtaccaggagctgtacgactatgtgaatcacagactgtcccacacctgtctgatgaggccagggcc  
ctgctgccaacgtgatccaaggaggtgtctcacgagatcaaaagataggcgtttaccagcagacaagttctttccacgtgct  
atcacactgaactatcaggccccaattccccatcaagttcaaccagagggtgaatgcctacctgaaggagcaccggagacacct  
tcatcggcatcagcggggcagagaaaacctgatctatcacagtatcactccaccggcaagatcctggagcagcggagcctga  
acacatccagcagtttgattaccagaagaagctggacaacagggagaaggagagggtggcagcaaggcagcggcctggtctgtggtg  
ggcacaatcaaggatctgaagcagggtatctgagccaggtcatccagagatcgtggacctgatccactaccaggccgtggtg  
gtgctggagaacctgaatttcggcttaagagcaagaggaccggcctcggcagagaaggccgtgtaccagcagttcgagaagatgctg  
atcgataagctgaattgcctggtgctgaaggactatccagcagagaaagtgggagggcgtgctgaaccataccagctgacagaccag  
ttcacctccttgccaagatggcaccagctgtggcttctgtttacgtgcctgcccatacatctaagatgatccctgaccggcttc  
gtggacccttctgtggaaccatcaagaatcacgagagccgaagcactcctgaggggcttcgactttctgactacgactgga  
aaaccggcgacttcactcctgacacttaagatgaacagaatctgtcctccagagggcctgcccggctttatgctgcatgggatc  
gttcgagaagaacgagacacagttgacccaaggcaccctttcctcggcggcaagagaatcgtgccagtgatcgagaatcaca  
gattaccggcagataccgggacctgtatcctgccaacgagctgatccctgctggaggagaaggcctcgtgttcagggatggct  
ccaacatcctgccaagctgctggagaatgacgattctcagccatcagaccatggtggcctgatccgcagcgtgctgcagatg  
gaactccaatccgccacaggcaggactatcaacaagccccgtgcgcatctgaatggcgtgcttcgactcccgtttcagaac  
ccagagtggccatggacgccgatccaatggcgcctaccacatgccctgaaggccagctgctgctgaatcactgaaggagag  
caaggatctgaagctgcagaacggcatctccaatcaggactgctgctcctacatccaggagctgcgcaaaaaaggccggccca

cgaaaaaggccgagcagcaaaaaagaaagGGCAGTCCTAAAAAGAAACGTAAAGTGgatacctc  
gagcaccaccaccaccactgagatccggctgtaacaaagcccgaaggaagctgagttggctgctccaccgctgagcaata  
actagcataacccttggggcctctaacgggtcttgaggggttttctgaaaggaggaactatataccggat

**pAAV CD19-CAR**

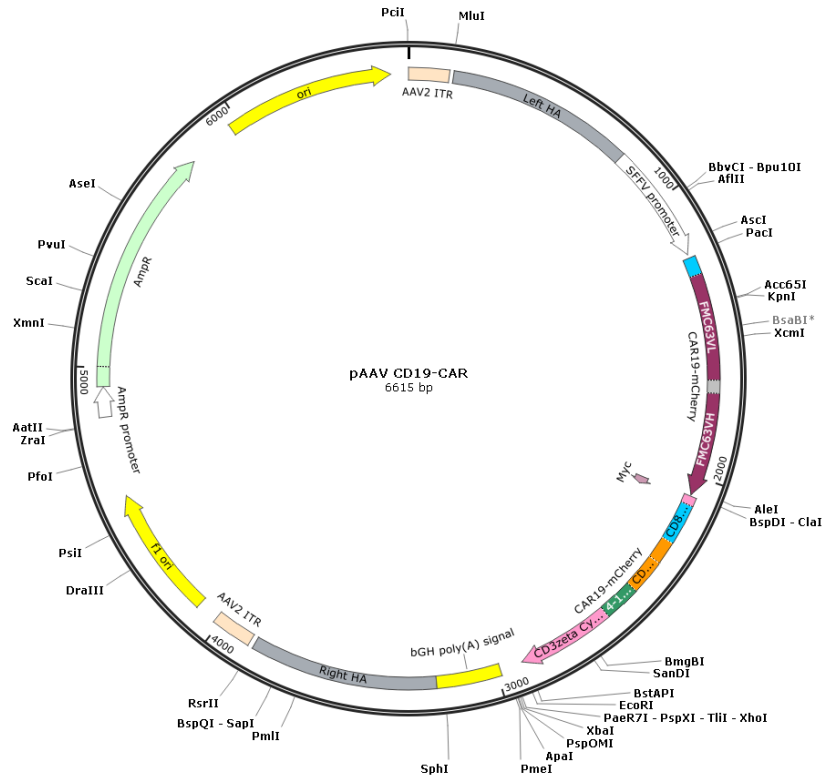

cctgcaggcagctgcgcgctcgtcgtcactgaggccgccgggcaagcccggcgctcggggaccttggctgcccggctc  
agtgagcagcagcgcgcgagagaggagtgccaactccatcactaggggttctgcggccgcacgcgtgatgaaggagctgc  
tctgacttgcctcaagccttatatcagtaaacggtagtgctggggcttagacgcaggttctgattatagttcaaaccttatcaatg  
agagagcaatcctctgtaattgtatagattccaacttaagccaacatacacaacccctccattctgctaagccagcctaagttgg  
ggagaccactccagattccaagatgtacagtttgcttctgctgggccttttccatgcctgccttactctgccagattatgtctggggtt  
ttgaagaagatcctattaataaaagaataagcagttatattaagtagccctgcatttcaggttcccttgagtgaggccagcagcctggcc  
gtgaacgttactgaaatcatggcctcttggccaagattgatagcttgctcctgagtcacagtcacagcagctggttctca  
agatgctatttccgataaagcatgagaccgtgacttgcagccccacagagccccgccttgcctcactggcatctggactccag  
cctgggttggggcaagaggggaatgagatcatgtcctaacctgacctctgtcccacagatatccagaacctgacctgcccgtaa  
cgccatttgaaggcatggaaaaataccaaccaagaatagagaagttcagatcaaggcgggtacatgaaaatagctaactgtggg  
ccaacaggatctgcggtgagcagtttgcggccggccgggccaagaacagatggtcaccgagtttgcggccggccggag  
gccaagaacagatggtcccagatggtcccacacctcagcagtttctaagaccatcagatggttccaggctcccccaaggacctga  
aatgacctgcgccttatttgaattaaccaatcagcctgcttctcgttctgttcgcgcgcttctgcttcccagctctataaaagagctca  
aacccctcactcggcgcgagcctcctccgacagactgagtcgccgggtaattaaGCCACCATGGCCCTGCCTGT  
GACCGCACTGCTGCTGCCCTGGCCCTGCTGCTGCACGCTGCTCGACCCGACATT  
CAGATGACTCAGACAACAAGCTCCCTGTCCGCCTCTCTGGGCGACAGAGTGACCA  
TCAGCTGCCGGGCCTCTCAGGATATCAGCAAGTATCTGAACTGGTACCAGCAGAA  
GCCTGACGGCACAGTGAAGCTGCTGATCTATCACACCTCCAGACTGCACTCTGGA  
GTGCCAAGCAGGTTTCAGCGGATCCGGATCTGGCACAGACTACTCCCTGACCATCT  
CTAACCTGGAGCAGGAGGATATCGCCACATATTTCTGTGTCAGCAGGGCAATACACT  
GCCATACACCTTTGGCGGCGGCACAAAGCTGGAGATCACCCGGGCAGACGCAGC  
ACCAACCGTGTCTATCTTTCCCCCTTCTAGCAACGGCGGAGGAGGATCCGGAGGA  
GGAGGATCTGGCGGCGGCGGCAGCGAGGTGAAGCTGCAGGAGAGCGGACCAGG

CCTGGTGGCACCCAGCCAGTCCCTGTCTGTGACATGCACCGTGTCCGGCGTGTCT  
CTGCCTGATTACGGCGTGTCTTGGATCAGGCAGCCACCAAGGAAGGGCCTGGAGT  
GGCTGGGCGTGATCTGGGGCAGCGAGACAACATACTATAATAGCGCCCTGAAGT  
CCAGACTGACCATCATCAAGGACAACAGCAAGTCCCAGGTGTTCTGAAGATGA  
ACAGCCTGCAGACAGACGATACCGCCATCTACTATTGCGCCAAGCACTACTATTA  
CGGCGGCAGCTATGCCATGGATTACTGGGGCCAGGGCACATCCGTGACCGTGTCC  
TCTATCGATGAGCAGAAGCTGATCAGCGAGGAGGATCTGAAGCCAACCACAACC  
CCTGCACCAAGGCCTCCAACACCAGCACCTACCATCGCCTCTCAGCCTCTGAGCC  
TGCGGCCCGAGGCCTGTAGGCCCGCAGCAGGCGGCGCCGTGCACACACGCGGCC  
TGGACTTCGCCTGCGATTTTTGGGTGCTGGTGGTGGTGGGAGGCGTGCTGGCCTG  
TTATTCCCTGCTGGTGACCGTGGCCTTCATCATCTTTTGGGTGCGCAGCAAGCGGA  
GCCGGCTGCTGACTCTGACTACATGAACATGACACCAAGACGGCCCGGACCAA  
CCCGGAAGCACTATCAGCCTTACGCCCCACCTAGGGATTTTCGCAGCATATCGGTC  
CAAGAGAGGCAGGAAGAAGCTGCTGTACATCTTCAAGCAGCCCTTTATGCGCCCT  
GTGCAGACAACCCAGGAGGAGGACGGCTGCAGCTGTCGGTTCACAGAGGAGGAG  
GAGGGAGGATGTGAGCTGCGCGTGAAGTTTTCTCGGAGCGCCGATGCACCTGCAT  
ATCAGCAGGGACAGAATCAGCTGTACAACGAGCTGAATCTGGGCAGGCGCGAGG  
AGTACGACGTGCTGGATAAGAGGAGAGGCCGGACCCCGAGATGGGAGGCAAG  
CCTAGGCGCAAGAACCCACAGGAGGGCCTGTATAATGAGCTGCAGAAGGACAAG  
ATGGCCGAGGCCTACAGCGAGATCGGCATGAAGGGAGAGCGGAGAAGGGGCAA  
GGGACACGATGGCCTGTATCAGGGCCTGTCCACAGCCACCAAGGACACCTACGA  
TGCCCTGCACATGCAGGCCCTGCCACCAAGGTAAgaattctgcagatatccagcacagtggcggccg  
ctcgagtctagaggccccgttaaacccgctgacagcctcactgtgcttctagtggccagccatctgtgtttgccccccccctgc  
cttccttgaccctggaaggtgccactcccactgtcctttcctaataaaatgaggaaatgcatgcattgtctgagtaggtgcattctattct  
ggggggtggggtggggcaggacagcaagggggaggattgggaagacaatagcaggcatgctgggatgcggtgggctctatggt  
aaatccagtacaagctgtctgctattaccgattttgattctcaacaaatgtgtcacaagaatgattctgatgtatatacagac  
aaaactgtgctagacatgaggctatggactcaagagcaacagtgtgtggcctggagcaacaatctgactttgcatgtgcaaacgc  
cttcaacaacagcattattccagaagacaccttctcccagccaggtaaaggcagcttgggtgccttcgaggctgttcttcctgctcag  
gaatggccaggtctgcccagagctctgtcaatgatgtctaaactcctctgattgggtgtctcggccttatccattgccacaaaacc  
tcttttactaagaacagtgagccttgtctggcagtcagagaatgacacgggaaaaagcagatgaagagaaggtggcaggagag  
ggcactgtggccagcctcagctctccaactgagttcctgctgctgcttctcagactgttggcccttactgctcttagcctcat  
tctaagcccccttccaagttgectctcttattctccctgtctgcaaaaaatcttcccagctcactaagtcagtctcacgagtcactcat  
taaccaccggaccgagcggccgaggaaccctagtgatggagttggccactccctctctgctgctgctcactgagggcgg  
ggcgacaaaaggtgcccgacgcccgggctttgccccggcggcctcagtgagcagcgcgagcgtgctgagggggcgc  
ctgatgcggtattttctcttacgcatctgtgcggtatttccaccgatacgtcaaaagcaaccatagtagcgcgcctgtagcggcgatt  
aagcgcggcgggtgtggtgttacgcgagcgtgaccgctacacttgcagcgccttagcggcgccttctgcttcttcccttctt  
tctcgccacttgcggcttccccgcaagctctaaatgggggctcccttaggggtccgatttagtctttacggcactcagcccc  
aaaaaactgatttgggtgatggttcacgtagtgggccatcgcctgatagacggttttccctttgacgttgagtcacgttcttfaat  
agtggactctgttccaactggaacaacactcaaccctatctcgggctattctttgattataagggtttgcccatttggcctattggtt  
aaaaaatgagctgatttaaaaaattaacgcgaatttaaaaaatataacgtttacaattttatggtgactctcagtacaatctgctctg  
atgcccatagftaagccagccccgacaccgccaacaccgctgacgcgcctgacgggctgtctgctcccggcatccgcttaca  
gacaagctgtgaccgtctccgggagctgcatgtgtcagaggtttaccgctatcaccgaaacgcgcgagacgaaagggcctctgat  
acgcctattttataggttaatgctatgataaatggttcttagacgtcaggtggcacttttggggaaatgtgcgcggaaccctatttgt  
ttatttttaataacatfcaaatatgatccgctcatgagacaataaccctgataaatgctcaataatattgaaaaaggaagatgatgat  
tcaacatttccgtgctgccccatttccccgttggcattttgcttctgttttctcaccagaaacgctggtgaaagtaaaagatgctg  
aagatcagttgggtgacagagtgggttacatgaactggtatcaacagcggtaatgagatccttgagagtttcccccgaagaacgtttc  
caatgatgagcacttttaagttctgctatgtggcgcggtattatcccgtattgacggcggcaagagcaactcggctgcccatacact  
attctcagaatgacttgggtgagtactaccagtcacagaaaagcatcttacggatggcatgacagtaagagaatfatgagtgctgcat  
aacatgagtgataacactgcggccaacttactctgacaacatcggaggaccgaaggagctaaccgctttttgacaacatgggg  
gatcatgtaactgccttgatcgttgggaaccggagctgaatgaagccatacacaacgacgagcgtgacaccacgatgctctagcaa  
tggcaacaacgttgcgcaactattaactgcaactacttacttagcttcccggcaacaattaatagactggatggagggcgataaa

gttgaggaccacttctgcgctcggccctccggctggtggtttattgctgataaatctggagccgggtgagcgtgggtctcgcgggtatc  
attgcagcactggggccagatggaagccctcccgtatcgtatgtatctacacgacggggagtcaggcaactatggatgaacgaata  
gacagatcgtgagataggtgcctcactgattaagcattgtaactgtagaccaagttactcatatatactttagattgattaaaactca  
ttttaattaaaaggatctaggtgaagatccttttgataatcctatgacaaaatccctaacgtgagtttctccactgagcgtcagacc  
ccgtagaaaaagatcaaaggatcttcttgagatcctttttctgctgtaatctgctgcttgcacaaacaaaaaacaccgctaccagcggg  
ggtttggttgcgggatcaagagctaccaactcttttccgaaggttaactgcttcagcagagcgcagataccaaatactgctctctagtg  
agccgtagtttagccaccactcaagaactctgtagcaccgcctacacctcgtctgtaatcctgttaccagtggtgctgccagtg  
gcgataagtcgttcttaccgggttgactcaagacgatgtaccggataaggcgcagcggtcgggctgaacggggggttcgtgca  
cacagcccagcttgagcgaacgacctacaccgaactgagatacctacagcgtgagctatgagaagcggccacgcttccgaaggg  
agaaaggcggacaggtatccggtaagcggcagggtcggaacaggagagcgcacagggagcttcagggggaacgcctggtat  
ctttatagctctgctgggttcgccacctgacttgagcgtcgtatgttgatgctcgtcagggggcggagcctatggaaaacgcc  
gcaacgcggccttttacggtcctggtccttttgctggcctttgctcacatgt

**pAAV-RC6**

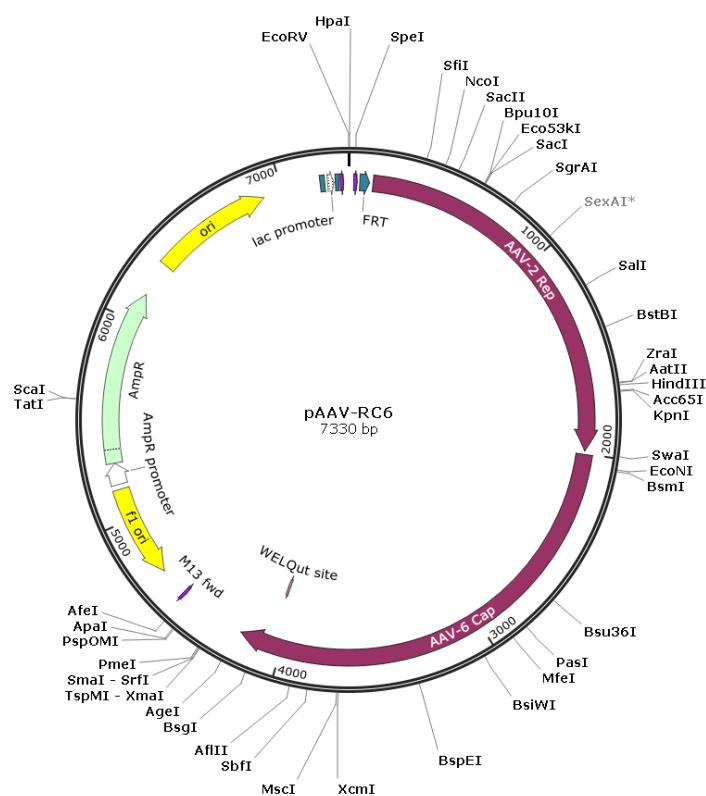

ATCGTTAACGCCCCGCGCCGGCCGCTCTAGAACTAGTGGATCCCCCGGAAGATCA  
GAAGTTCCTATTCCGAAGTTCCTATTCTCTAGAAAGTATAGGAACTTCTGATCTGC  
GCAGCCGCCATGCCGGGTTTACGAGATTGTGATTAAGGTCCCCAGCGACCTTG  
ACGAGCATCTGCCCGGCATTTCTGACAGCTTTGTGAACTGGGTGGCCGAGAAGGA  
ATGGGAGTTGCCGCCAGATTCTGACATGGATCTGAATCTGATTGAGCAGGCACCC  
CTGACCGTGGCCGAGAAGCTGCAGCGCGACTTTCTGACGGAATGGCGCCGTGTG  
AGTAAGGCCCGGAGGCCCTTTTCTTTGTGCAATTTGAGAAGGGAGAGAGCTACT  
TCCACATGCACGTGCTCGTGGAACCACCGGGGTGAAATCCATGGTTTTGGGACG  
TTTCTGAGTCAGATTTCGCGAAAACTGATTCAGAGAATTTACCGCGGGATCGAG  
CCGACTTTGCCAACTGGTTCGCGGTCACAAAGACCAGAAATGGCGCCGGAGGC  
GGGAACAAGGTGGTGGATGAGTGCTACATCCCAATTACTTGCTCCCCAAAACCC  
AGCCTGAGCTCCAGTGGGCGTGGACTAATATGGAACAGTATTTAAGCGCCTGTTT  
GAATCTCACGGAGCGTAAACGGTTGGTGGCGCAGCATCTGACGCACGTGTGCGCA  
GACGCAGGAGCAGAACAAGAGAATCAGAATCCCAATTCTGATGCGCCGGTGAT

CAGATCAAAAACCTTCAGCCAGGTACATGGAGCTGGTTCGGGTGGCTCGTGGACAA  
GGGGATTACCTCGGAGAAGCAGTGGATCCAGGAGGACCAGGCCTCATACATCTC  
CTTCAATGCGGCCTCCAACCTCGCGGTCCCAAATCAAGGCTGCCTTGGACAATGCG  
GGAAAGATTATGAGCCTGACTAAAACCGCCCCGACTACCTGGTGGGCCAGCAG  
CCCGTGGAGGACATTTCCAGCAATCGGATTTATAAAAATTTTGGAACTAAACGGGT  
ACGATCCCCAATATGCGGCTTCCGTCTTTCTGGGATGGGCCACGAAAAGTTCGG  
CAAGAGGAACACCATCTGGCTGTTTGGGCCTGCAACTACCGGGAAGACCAACAT  
CGCGGAGGCCATAGCCACACTGTGCCCTTCTACGGGTGCGTAAACTGGACCAAT  
GAGAACTTTCCCTTCAACGACTGTGTGACAAAGATGGTGATCTGGTGGGAGGAGG  
GGAAGATGACCGCCAAGGTCGTGGAGTCGGCCAAAGCCATTCTCGGAGGAAGCA  
AGGTGCGCGTGGACCAGAAATGCAAGTCCTCGGCCAGATAGACCCGACTCCCG  
TGATCGTCACCTCCAACACCAACATGTGCGCCGTGATTGACGGGAACTCAACGAC  
CTTCGAACACCAGCAGCCGTTGCAAGACCGGATGTTCAAATTTGAACTCACCCGC  
CGTCTGGATCATGACTTTGGGAAGGTCACCAAGCAGGAAGTCAAAGACTTTTTCC  
GGTGGGCAAAGGATCACGTGGTTGAGGTGGAGCATGAATTCTACGTCAAAAAGG  
GTGGAGCCAAGAAAAGACCCGCCCCAGTGACGCAGATATAAGTGAGCCCAAAC  
GGGTGCGCGAGTCAGTTGCGCAGCCATCGACGTGACGCGGGAAGCTTCGATCA  
ACTACGCAGACAGGTACCAAACAATGTTCTCGTCACGTGGGCATGAATCTGAT  
GCTGTTTCCCTGCAGACAATGCGAGAGAATGAATCAGAATTCAAATATCTGCTTC  
ACTACGGACAGAAAGACTGTTTAGAGTGCTTTCCCGTGTGAGAATCTCAACCCG  
TTTCTGTCGTCAAAAAGGCGTATCAGAAACTGTGCTACATTCATCATATCATGGG  
AAAGGTGCCAGACGCTTGCCTGACTGCCTGCGATCTGGTCAATGTGGATTTGGATGAC  
TGCATCTTTGAACAATAAATGATTTAAATCAGGTATGGCTGCCGATGGTTATCTTC  
CAGATTGGCTCGAGGACAACCTCTCTGAGGGCATTTCGCGAGTGGTGGGACTTGAA  
ACCTGGAGCCCCGAAACCCAAAGCCAACCAGCAAAGCAGGACGACGGCCGGG  
GTCTGGTGCTTCCCTGGCTACAAGTACCTCGGACCCTTCAACGGACTCGACAAGGG  
GGAGCCCGTCAACGCGGCGGATGCAGCGGCCCTCGAGCACGACAAGGCCTACGA  
CCAGCAGCTCAAAGCGGGTGACAATCCGTACCTGCGGTATAACCACGCCGACGC  
CGAGTTTCAGGAGCGTCTGCAAGAAGATACGTCTTTTGGGGGCAACCTCGGGCGA  
GCAGTCTTCCAGGCCAAGAAGAGGGTTCTCGAACCTCTTGGTCTGGTTGAGGAAG  
GTGCTAAGACGGCTCCTGGAAAGAAACGTCCGGTAGAGCAGTCGCCACAAGAGC  
CAGACTCCTCCTCGGGCATTGGCAAGACAGGCCAGCAGCCCGCTAAAAAGAGAC  
TCAATTTTGGTCAGACTGGCGACTCAGAGTCAGTCCCCGACCCACAACCTCTCGG  
AGAACCTCCAGCAACCCCGCTGCTGTGGGACCTACTACAATGGCTTCAGGCGGT  
GGCGACCAATGGCAGACAATAACGAAGGCGCCGACGGAGTGGGTAATGCCTCA  
GGAAATTGGCATTGCGATTCCACATGGCTGGGCGACAGAGTCATCACCACCAGC  
ACCCGAACATGGGCCTTGCCACCTATAACAACCACCTCTACAAGCAAATCTCCA  
GTGCTTCAACGGGGGCCAGCAACGACAACCACTACTTCGGCTACAGCACCCCTG  
GGGGTATTTGATTTCAACAGATTCCACTGCCATTTCTCACCACGTGACTGGCAGC  
GACTCATCAACAACAATTGGGGATTCCGGCCCAAGAGACTCAACTTCAAGCTCTT  
CAACATCCAAGTCAAGGAGGTCACGACGAATGATGGCGTCACGACCATCGCTAA  
TAACCTTACCAGCACGGTTCAAGTCTTCTCGGACTCGGAGTACCAGTTGCCGTAC  
GTCCTCGGCTCTGCGCACCAAGGGCTGCCTCCCTCCGTTCCCGGCGGACGTGTTTCA  
GATTCCGAGTACGGCTACCTAACGCTCAACAATGGCAGCCAGGCAGTGGGACG  
GTCATCCTTTTACTGCCTGGAATATTTCCCATCGCAGATGCTGAGAACGGGCAAT  
AACTTTACCTTCAGCTACACCTTCGAGGACGTGCCCTTTCACAGCAGCTACGCGC  
ACAGCCAGAGCCTGGACCGGCTGATGAATCCTCTCATCGACCAGTACCTGTATTA  
CCTGAACAGAACTCAGAATCAGTCCGGAAGTGCCCAAAAACAAGGACTTGCTGTTT  
AGCCGGGGGTCTCCAGCTGGCATGTCTGTTTACGCCAAAACACTGGCTACCTGGAC  
CCTGTTACCGGCAGCAGCGGTTTCTAAAACAAAACAGACAACAACAACAGCA  
ACTTTACCTGGACTGGTGCTTCAAATATAACCTTAATGGGCGTGAATCTATAAT



CAACCCTGGCACTGCTATGGCCTCACACAAAGACGACAAAGACAAGTTCTTTCCC  
ATGAGCGGTGTCATGATTTTTGGAAAGGAGAGCGCCGGAGCTTCAAACACTGCAT  
TGGACAATGTCATGATCACAGACGAAGAGGAAATCAAAGCCACTAACCCCGTGG  
CCACCGAAAGATTTGGGACTGTGGCAGTCAATCTCCAGAGCAGCAGCACAGACC  
CTGCGACCGGAGATGTGCATGTTATGGGAGCCTTACCTGGAATGGTGTGGCAAGA  
CAGAGACGTATACCTGCAGGGTCTATTTGGGCCAAAATTCCTCACACGGATGGA  
CACTTTCACCCGTCTCCTCTCATGGGCGGCTTTGGACTTAAGCACCCGCCTCCTCA  
GATCCTCATCAAAAACACGCCTGTTCTGCGAATCCTCCGGCAGAGTTTTCGGCT  
ACAAAGTTTGCTTCATTCATCACCCAGTATTCACAGGACAAGTGAGCGTGGAGA  
TTGAATGGGAGCTGCAGAAAGAAAACAGCAAACGCTGGAATCCCGAAGTGCAGT  
ATACATCTAACTATGCAAAAATCTGCCAACGTTGATTTCACTGTGGACAACAATGG  
ACTTTATACTGAGCCTCGCCCCATTGGCACCCGTTACCTCACCCGTCCCCTGTAAT  
TGTGTGTTAATCAATAAACCGGTTAATTCGTGTGTCAGTTGAACTTTGGTCTCATGTC  
GTTATTATCTTATCTGGTCACCAGATCCCCGTAGATAAGTAGCATGGCAGGTTAA  
TCATTAACACTACAGCCCGGGCGTTTAAACAGCGGGCGGAGGGGTGGAGTCGTGAC  
GTGAATTACGTATAGGGTTAGGGAGGTCCTGTATTAGAGGTCACGTGAGTGT  
TGCGACATTTTGCGACACCATGTGGTCTCGCTGGGGGGGGGGGCCCGAGTGAGC  
ACGCAGGGTCTCCATTTTGAAGCGGGAGGTTTGAACGAGCGCTGGCGCGCTCACT  
GGCCGTCGTTTTACAACGTCGTGACTGGGAAAACCCTGGCGTTACCCAACCTAAT  
CGCCTTGCAGCACATCCCCCTTTCGCCAGCTGGCGTAATAGCGAAGAGGCCCGCA  
CCGATCGCCCTTCCCAACAGTTGCGCAGCCTGAATGGCGAATGGAAATTGTAAGC  
GTTAATATTTTGTAAATTCGCGTTAAATTTTGTAAATCAGCTCATTTTTTTAA  
CCAATAGGCCGAAATCGGCAAAATCCCTTATAAATCAAAGAATAGACCGAGAT  
AGGGTTGAGTGTGTTCCAGTTTGAACAAGAGTCCACTATTAAGAACGTGGACT  
CCAACGTCAAAGGGCGAAAAACCGTCTATCAGGGCGATGGCCCACTACGTGAAC  
CATCACCTAATCAAGTTTTTTGGGGTCGAGGTGCCGTAAAGCACTAAATCGGAA  
CCCTAAAGGGAGCCCCGATTTAGAGCTTGACGGGGAAAGCCGGCGAACGTGGC  
GAGAAAGGAAGGGAAGAAAGCGAAAGGAGCGGGCGCTAGGGCGCTGGCAAGTG  
TAGCGGTACGCTGCGCGTAACCACCACACCCGCCGCGCTTAATGCGCCGCTACA  
GGGCGCGTCAGGTGGCACTTTTCGGGGAAATGTGCGCGGAACCCCTATTTGTTA  
TTTTTCTAAATACATTCAAATATGTATCCGCTCATGAGACAATAACCCCTGATAAAT  
GCTTCAATAATATTGAAAAAGGAAGAGTATGAGTATTCAACATTTCCGTGTCGCC  
CTTATTCCCTTTTTTGCGGCATTTCCTTCTGTTTTTGTTCACCCAGAAACGCTG  
GTGAAAGTAAAGATGCTGAAGATCAGTTGGGTGCACGAGTGGGTACATCGAA  
CTGGATCTCAACAGCGGTAAGATCCTTGAGAGTTTTTCGCCCCGAAGAACGTTTTC  
CAATGATGAGCACTTTTAAAGTTCTGCTATGTGGCGCGGTATTATCCCGTATTGAC  
GCCGGGCAAGAGCAACTCGGTGCGCCGATACACTATTCTCAGAATGACTTGGTTG  
AGTACTACCAGTCACAGAAAAGCATCTTACGGATGGCATGACAGTAAGAGAAT  
TATGCAGTGCTGCCATAACCATGAGTGATAAACTGCGGCCAACTTACTTCTGAC  
AACGATCGGAGGACCGAAGGAGCTAACCGCTTTTTTGCACAACATGGGGGATCA  
TGTAACCTCGCCTTGATCGTTGGGAACCGGAGCTGAATGAAGCCATACCAAACGAC  
GAGCGTGACACCACGATGCCTGTAGCAATGGCAACAACGTTGCGCAAACCTATTA  
ACTGGCGAACTACTTACTTAGCTTCCCGGCAACAATTAATAGACTGGATGGAGG  
CGGATAAAGTTGCAGGACCACTTCTGCGCTCGGCCCTTCCGGCTGGCTGGTTTAT  
TGCTGATAAATCTGGAGCCGGTGAGCGTGGGTCTCGCGGTATCATTGCAGCACTG  
GGGCCAGATGGTAAGCCCTCCCGTATCGTAGTTATCTACACGACGGGGAGTCAGG  
CAACTATGGATGAACGAAATAGACAGATCGCTGAGATAGGTGCCTCACTGATTA  
AGCATTGGTAACCTGTCAGACCAAGTTTACTCATATATACTTTAGATTGATTTAAA  
ACTTCATTTTTAAATTTAAAAGGATCTAGGTGAAGATCCTTTTTGATAATCTCATGA  
CCAAAATCCCTAACGTGAGTTTTCGTTCCTACTGAGCGTCAGACCCCGTAGAAAA  
GATCAAAGGATCTTCTTGAGATCCTTTTTTCTGCGCGTAATCTGCTGCTTGCAA

CAAAAAACCACCGCTACCAGCGGTGGTTTGTGGCCGGATCAAGAGCTACCAAC  
TCTTTTTCCGAAGGTAAGTGGCTTCAGCAGAGCGCAGATACCAAATACTGTTCTT  
CTAGTGTAGCCGTAGTTAGGCCACCACTTCAAGAACTCTGTAGCACCGCCTACAT  
ACCTCGCTCTGCTAATCCTGTTACCAGTGGCTGCTGCCAGTGGCGATAAGTCGTG  
TCTTACCGGGTTGGACTCAAGACGATAGTTACCGGATAAGGCGCAGCGGTCTGGG  
CTGAACGGGGGGTTCGTGCACACAGCCCAGCTTGGAGCGAACGACCTACACCGA  
ACTGAGATACCTACAGCGTGAGCTATGAGAAAGCGCCACGCTTCCCGAAGGGAG  
AAAGGCGGACAGGTATCCGTAAGCGGCAGGGTCGGAACAGGAGAGCGCACGA  
GGGAGCTTCCAGGGGAAACGCCTGGTATCTTTATAGTCCTGTTCGGGTTTCGCCA  
CCTCTGACTTGAGCGTTCGATTTTTGTGATGCTCGTCAGGGGGGCGGAGCCTATGG  
AAAACGCCAGCAACGCGGCCTTTTTACGGTTCCTGGCCTTTTGCTGGCCTTTTGC  
TCACATGTTCTTTCCTGCGTTATCCCCTGATTCTGTGGATAACCGTATTACCGCCT  
TTGAGTGAGCTGATACCGCTCGCCGACGCCAAGACCGAGCGCAGCGAGTCAG  
TGAGCGAGGAAGCGGAAGAGCGCCCAATACGCAAACCGCCTCTCCCCGCGCGTT  
GGCCGATTCATTAATGCAGCTGGCACGACAGGTTTCCCGACTGGAAAGCGGGCA  
GTGAGCGCAACGCAATTAATGTGAGTTAGCTCACTCATTAGGCACCCAGGCTTT  
ACACTTTATGCTTCCGGCTCGTATGTTGTGTGGAATTGTGAGCGGATAACAATTT  
ACACAGGAAACAGCTATGACCATGATTACGCCAAGCGCGCCGAT

**pHelper**

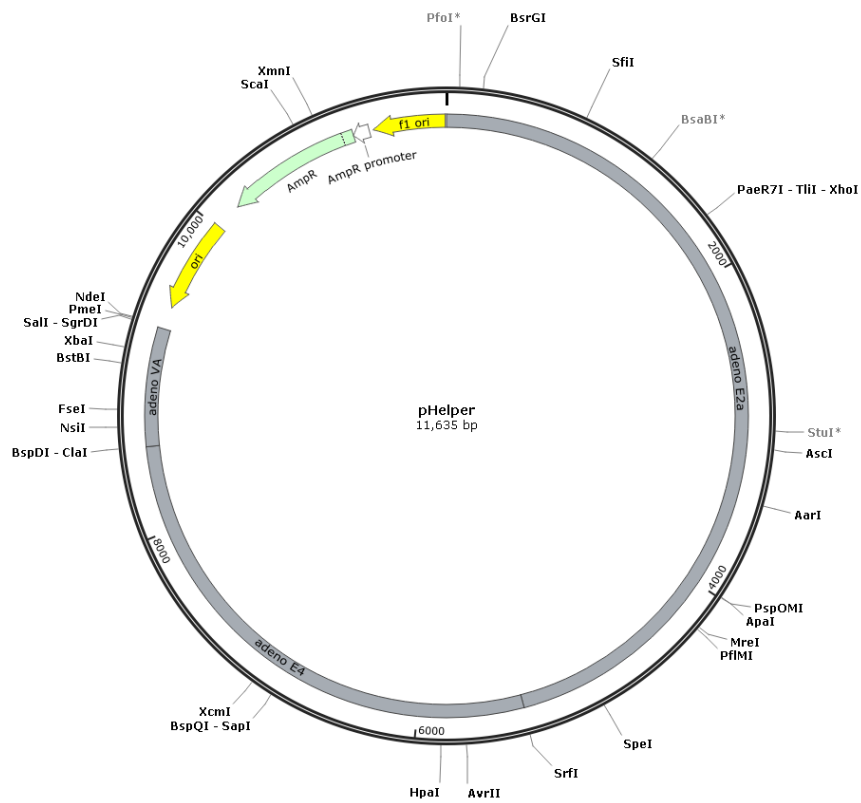

GGTACCCAACCTCCATGCTTAACAGTCCCCAGGTACAGCCCACCTGCGTTCGCAAC  
CAGGAACAGCTCTACAGCTTCCTGGAGCGCCACTCGCCCTACTTCCGCAGCCACA  
GTGCGCAGATTAGGAGCGCCACTTCTTTTTGTCACTTGAAAAACATGTAAAAATA  
ATGTACTAGGAGACACTTTCAATAAAGGCAAATGTTTTTATTTGTACTCTCGG  
GTGATTATTTACCCCCACCCTTGCCGTCTGCGCCGTTAAAAATCAAAGGGGTTTC  
TGCCGCGCATCGCTATGCGCCACTGGCAGGGACACGTTGCGATACTGGTGTTTAG  
TGCTCCACTTAAACTCAGGCACAACCATCCGCGGCAGCTCGGTGAAGTTTTCACT  
CCACAGGCTGCGCACCATACCAACGCGTTTAGCAGGTTCGGGCGCCGATATCTTG

AAGTCGCAGTTGGGGCCTCCGCCCTGCGCGCGAGTTGCGATACACAGGGTTGC  
AGCACTGGAACACTATCAGCGCCGGGTGGTGCACGCTGGCCAGCACGCTCTTGTC  
GGAGATCAGATCCGCGTCCAGGTCCTCCGCGTTGCTCAGGGCGAACGGAGTCAA  
CTTTGGTAGCTGCCTTCCCAAAAAGGGTGCATGCCAGGCTTTGAGTTGCACTCG  
CACCGTAGTGGCATCAGAAGGTGACCGTGCCCGGTCTGGGCGTTAGGATACAGC  
GCCTGCATGAAAGCCTTGATCTGCTTAAAAGCCACCTGAGCCTTTGCGCCTTCAG  
AGAAGAACATGCCGCAAGACTTGCCGGA AAAACTGATTGGCCGGACAGGCCGCGT  
CATGCACGCAGCACCTTGCCTCGGTGTTGGAGATCTGCACCACATTTCCGCCCCA  
CCGGTTCTTACGATCTTGGCCTTGCTAGACTGCTCCTCAGCGCGCGCTGCCCGT  
TTTCGCTCGTCACATCCATTTCAATCACGTGCTCCTTATTTATCATAATGCTCCCCT  
GTAGACACTTAAGCTCGCCTTCGATCTCAGCGCAGCGGTGCAGCCACAACGCGCA  
GCCCGTGGGCTCGTGGTGTGTTAGGTTACCTCTGCAAACGACTGCAGGTACGCC  
TGCAGGAATCGCCCCATCATCGTCAAAAAGGTCTTGTGCTGGTGAAGGTCAGCT  
GCAACCCGCGGTGCTCCTCGTTTAGCCAGGTCTTGCATACGGCCGCCAGAGCTTC  
CACTTGGTCAGGCAGTAGCTTGAAGTTTGCCTTTAGATCGTTATCCACGTGGTACT  
TGTCCATCAACGCGCGCGCAGCCTCCATGCCCTTCTCCACGCAGACAGATCGG  
CAGGCTCAGCGGGTTTATCACCGTGCTTTCACCTTTCCGCTTCACTGGACTCTTCCT  
TTTCCTCTTGCCTCCGCATACCCCGCGCCACTGGGTGCTCTTCATTCAGCCGCCGC  
ACCGTGCCTTACCTCCCTTGCCTGCTTATTAGCACCGGTGGGTTGCTGAAAC  
CCACCATTTGTAGCGCCACATCTTCTCTTCTTCCCTCGCTGTCCACGATCACCTCT  
GGGGATGGCGGGCGCTCGGGCTTGGGAGAGGGGCGCTTCTTTTTCTTTTTGGACG  
CAATGGCCAAATCCGCCGTCGAGGTGATGGCCGCGGGCTGGGTGTGCGCGGCA  
CCAGCGCATCTTGTGACGAGTCTTCTTCGCTCCTCGGACTCGAGACGCCGCCTCAG  
CCGCTTTTTTTGGGGGCGCGCGGGGAGGCGGCGGCGACGGCGACGGGGACGACAC  
GTCCTCCATGGTTGGTGGACGTGCGCGCCGACCGCGTCCGCGCTCGGGGGTGGTT  
TCGCGCTGCTCCTCTTCCCGACTGGCCATTTCTTCTCCTATAGGCAGAAAAAGAT  
CATGGAGTCAGTCGAGAAGGAGGACAGCCTAACCGCCCCCTTTGAGTTCGCCACC  
ACCGCTCCACCGATGCCGCCAACGCGCCTACCACCTTCCCCGTCGAGGGACCCC  
CGTTGAGGAGGAGGAAGTGATTATCGAGCAGGACCCAGGTTTTGTAAGCGAAG  
ACGACGAGGATCGCTCAGTACCAACAGAGGATAAAAAGCAAGACCAGGACGAC  
GCAGAGGCAAACGAGGAACAAGTCGGGCGGGGGGACCAAAGGCATGGCGACTA  
CCTAGATGTGGGAGACGACGTGCTGTTGAAGCATCTGCAGCGCCAGTGCGCCATT  
ATCTGCGACGCGTTGCAAGAGCGCAGCGATGTGCCCTCGCCATAGCGGATGTCA  
GCCTTGCCTACGAACGCCACCTGTTCTACCGCGCGTACCCCCAAACGCCAAGA  
AAACGGCACATGCGAGCCCAACCCGCGCCTCAACTTCTACCCCGTATTTGCCGTG  
CCAGAGGTGCTTGCCACCTATCACATCTTTTTCCAAA ACTGCAAGATACCCCTATC  
CTGCCGTGCCAACCGCAGCCGAGCGGACAAGCAGCTGGCCTTGCGGCAGGGGCGC  
TGTACATACCTGATATCGCTCGCTCGACGAAGTGCCAAAAATCTTTGAGGGTCTT  
GGACGCGACGAGAAACGCGCGGCAAACGCTCTGCAACAAGAAAACAGCGAAAA  
TGAAAGTCACTGTGGAGTGCTGGTGGAACTTGAGGGTGACAACGCGCGCCTAGC  
CGTGCTGAAACGCAGCATCGAGGTCACCCACTTTGCCTACCCGGCACTTAACCTA  
CCCCCAAGGTTATGAGCACAGTCATGAGCGAGCTGATCGTGCGCCGTGCACGAC  
CCCTGGAGAGGGATGCAAACCTGCAAGAACAACCGAGGAGGGCCTACCCGCAG  
TTGGCGATGAGCAGCTGGCGCGCTGGCTTGAAGACGCGGAGCCTGCCGACTTGG  
AGGAGCGACGCAAGCTAATGATGGCCGAGTGCTTGTACCCTGGAGCTTGAGT  
GCATGCAGCGGTTCTTTGCTGACCCGGAGATGCAGCGCAAGCTAGAGGAAACGT  
TGCACTACACCTTTCGCCAGGGCTACGTGCGCCAGGCCTGCAAAAATTTCCAACGT  
GGAGCTCTGCAACCTGGTCTCCTACCTTGAATTTTGCACGAAAACCGCCTCGGG  
CAAACGCTGCTTCAATTCCACGCTCAAGGGCGAGGCGCGCCGCGACTACGTCCGCG  
ACTGCGTTTACTTATTTCTGTGCTACACCTGGCAAACGGCCATGGGCGTGTGGCA  
GCAATGCCTGGAGGAGCGCAACCTAAAGGAGCTGCAGAAGCTGCTAAAGCAAAA

CTTGAAGGACCTATGGACGGCCTTCAACGAGCGCTCCGTGGCCGCGCACCTGGCG  
GACATTATCTTCCCCGAACGCCTGCTTAAAACCCTGCAACAGGGTCTGCCAGACT  
TCACCAGTCAAAGCATGTTGCAAACTTTAGGAACTTTATCCTAGAGCGTTCAGG  
AATTCTGCCCCGCACCTGCTGTGCGCTTCTAGCGACTTTGTGCCATTAAGTACC  
GTGAATGCCCTCCGCCGCTTTGGGGTCACTGCTACCTTCTGCAGCTAGCCAACTA  
CCTTGCCTACCACTCCGACATCATGGAAGACGTGAGCGGTGACGGCCTACTGGAG  
TGTCAGTGTGCTGCAACCTATGCACCCCGCACCGCTCCCTGGTCTGCAATTCGCA  
ACTGCTTAGCGAAAGTCAAATTATCGGTACCTTTGAGCTGCAGGGTCCCTCGCCT  
GACGAAAAGTCCGCGGTCCGGGGTTGAAACTCACTCCGGGGTGTGGACGTGCG  
GCTTACCTTCGCAAATTTGTACCTGAGGACTACCACGCCACGAGATTAGGTTCT  
ACGAAGACCAATCCCGCCCGCAAATGCGGAGCTTACCGCCTGCGTCATTACCCA  
GGGCCACATCCTTGGCCAATTGCAAGCCATCAACAAAGCCCGCAAAGAGTTTCTG  
CTACGAAAGGGACGGGGGTTTACCTGGACCCCCAGTCCGGCGAGGAGCTCAAC  
CCAATCCCCCGCCGCCGACCCCTATCAGCAGCCGCGGGCCCTTGTTCCCAGG  
ATGGCACCCAAAAAGAAGCTGCAGCTGCCGCCGCCACCCACGGACGAGGAG  
GAATACTGGGACAGTCAGGCAGAGGAGGTTTTGGACGAGGAGGAGGAGATGATG  
GAAGACTGGGACAGCCTAGACGAAGCTTCCGAGGCCGAAGAGGTGTCAGACGAA  
ACACCGTCACCCTCGGTGTCATTCCCCTCGCCGGCGCCCCAGAAATTGGCAACCG  
TTCCAGCATCGCTACAACCTCCGCTCCTCAGGCGCCGCCGGCACTGCCTGTTCCG  
CCGACCCAACCGTAGATGGGACACCACTGGAACCAGGGCCGGTAAGTCTAAGCA  
GCCGCCGCCGTTAGCCCAAGAGCAACAACAGCGCCAAGGCTACCGCTCGTGGCG  
CGGGCACAAGAACGCCATAGTTGCTTGCTTGCAAGACTGTGGGGGCAACATCTCC  
TTCGCCCGCCGCTTTCTTCTTCTACCATCACGGCGTGGCCTTCCCCGTAACATCCT  
GCATTACTACCGTCATCTTACAGCCCCTACTGCACCGGCCGGCAGCGGCAGCGGC  
AGCAACAGCAGCGGTACACAGAAGCAAAGGCGACCGGATAGCAAGACTCTGAC  
AAAGCCCAAGAAATCCACAGCGGCGGCAGCAGCAGGAGGAGGAGCGCTGCGTCT  
GGCGCCCAACGAACCCGTATCGACCCGCGAGCTTAGAAATAGGATTTTTCCCACT  
CTGTATGCTATATTTCAACAAAGCAGGGGCCAAGAACAAGAGCTGAAAATAAAA  
AACAGGTCTCTGCGCTCCCTCACCCGCGAGCTGCCTGTATCACAAAAGCGAAGATC  
AGCTTCGGCGCACGCTGGAAGACGCGGAGGCTCTCTTCAGCAAATACTGCGCGCT  
GACTCTTAAGGACTAGTTTTGCGGCCCTTTCTCAAATTTAAGCGCGAAAACACTACGT  
CATCTCCAGCGGCCACACCCGGCGCCAGCACCTGTGCTCAGCGCCATTATGAGCA  
AGGAAATTCACAGCCCTACATGTGGAGTTACCAGCCACAAATGGGACTTGCGGC  
TGGAGCTGCCAAGACTACTCAACCCGAATAAACTACATGAGCGCGGGACCCCA  
CATGATATCCCGGGTCAACGGAATCCGCGCCACCGAAACCGAATTTCTCCTCGAA  
CAGGCGGCTATTACCACACACCTCGTAATAACCTTAATCCCCGTAGTTGGCCCCG  
CTGCCCTGGTGTACCAGGAAAGTCCCCTCCCACTGTGGTACTTCCAGAGA  
CGCCAGGCCGAAGTTCAGATGACTAACTCAGGGGCGCAGCTTGCGGGCGGCTTT  
CGTCACAGGGTGCGGTCGCCCGGGCGTTTTAGGGCGGAGTAACTTGCATGTATTG  
GGAATTGTAGTTTTTTTTAAATGGGAAGTGACGTATCGTGGGAAAACGGAAGTG  
AAGATTTGAGGAAGTTGTGGTTTTTTGGCTTTCGTTTCTGGGCGTAGGTTGCGGT  
GCGGTTTTCTGGGTGTTTTTTGTGGACTTTAACCGTTACGTCATTTTTTAGTCCTAT  
ATACTCGCTCTGACTTGGCCCTTTTTACACTGTGACTGATTGAGCTGGTGCCG  
TGTCGAGTGGTGTTTTTTAATAGGTTTTTTACTGGTAAGGCTGACTGTTATGGCT  
GCCGCTGTGGAAGCGCTGTATGTTGTTCTGGAGCGGGAGGGTGCTATTTTGCCTA  
GGCAGGAGGGTTTTTCAGGTGTTTATGTGTTTTTCTCTCCTATTAATTTTTGTATAC  
CTCCTATGGGGGCTGTAATGTTGTCTCTACGCCTGCGGGTATGTATTCCCCGGGC  
TATTTGCGTTCGCTTTTTAGCACTGACCGATGTTAACCAACCTGATGTGTTTACCGA  
GTCTTACATTATGACTCCGGACATGACCGAGGAACTGTCCGGTGGTGCTTTTTAAT  
CACGGTGACCAGTTTTTTTACGGTACGCCGGCATGGCCGTAGTCCGTCTTATGCT  
TATAAGGGTTGTTTTTCCCTGTTGTAAGACAGGCTTCTAATGTTTAAATGTTTTTTTT

TTTGTTATTTTATTTTGTGTTAATGCAGGAACCCGCAGACATGTTTGAGAGAAAA  
ATGGTGTCTTTTTCTGTGGTGGTTCCGGAACCTACCTGCCTTTATCTGCATGAGCA  
TGACTACGATGTGCTTGGCTTTTTTGC GCGAGGCTTTGCCTGATTTTTTGAGCAGCA  
CCTTGCATTTTATATCGCCGCCATGCAACAAGCTTACATAGGGGCTACGCTGGT  
TAGCATAGCTCCGAGTATGCGTGT CATAATCAGTGTGGGTCTTTTTGTCATGGTTC  
CTGGCGGGGAAGTGGCCGCGCTGGTCCGTGCAGACCTGCACGATTATGTT CAGCT  
GGCCCTGCGAAGGGACCTACGGGATCGCGGTATTTTTGTTAATGTTCCGCTTTTTG  
AATCTTATACAGGTCTGTGAGGAACCTGAATTTTTGCAATCATGATTCGCTGCTTG  
AGGCTGAAGGTGGAGGGCGCTCTGGAGCAGATTTTTACAATGGCCG GACTTAAT  
ATTCGGGATTTGCTTAGAGACATATTGATAAGGTGGCGAGATGAAAATTATTTGG  
GCATGGTTGAAGGTGCTGGAATGTTTATAGAGGAGATTCACCCTGAAGGGTTTAG  
CCTTTACGTCCACTTGGACGTGAGGGCAGTTTGCCTTTTTGGAAGCCATTGTGCAA  
CATCTTACAAATGCCATTATCTGTTCTTTGGCTGTAGAGTTTGACCACGCCACCGG  
AGGGGAGCGCGTTCACTTAATAGATCTTCATTTTGAGGTTTTGGATAATCTTTTGG  
AATAAAAAAAAAAAAAACATGGTTCTTCCAGCTCTTCCCGCTCCTCCCGTGTGTGA  
CTCGCAGAACGAATGTGTAGGTTGGCTGGGTGTGGCTTATTCTGCGGTGGTGGAT  
GTTATCAGGGCAGCGGCCATGAAGGAGTTTACATAGAACCCGAAGCCAGGGGG  
CGCTGGATGCTTTGAGAGAGTGGATATACTACA ACTACTACACAGAGCGAGCTA  
AGCGACGAGACCGGAGACGCAGATCTGTTTGT CACGCCCGCACCTGGTTTTGCTT  
CAGGAAATATGACTACGTCCGGCGTTCATTTGGCATGACACTACGACCAACACG  
ATCTCGGTTGTCTCGGCGCACTCCGTACAGTAGGGATCGCCTACCTCCTTTTGAGA  
CAGAGACCCGCGCTACCATACTGGAGGATCATCCGCTGCTGCCC GAATGTAACAC  
TTTGACAATGCACAACGTGAGTTACGTGCGAGGTCTTCCCTGCAGTGTGGGATTT  
ACGCTGATTCAGGAATGGGTGTTCCCTGGGATATGGTTCTGACGCGGGAGGAGC  
TTGTAATCCTGAGGAAGTGTATGCACGTGTGCCCTGTGTTGTGCCAACATTGATAT  
CATGACGAGCATGATGATCCATGGTTACGAGTCCTGGGCTCTCCACTGTCATTGT  
TCCAGTCCCGGTTCCCTGCAGTGCATAGCCGGCGGGCAGGTTTTGGCCAGCTGGT  
TTAGGATGGTGGTGGATGGCGCCATGTTAATCAGAGGTTTATATGGTACCGGGA  
GGTGGTGAATTACAACATGCCAAAAGAGGTAATGTTTATGTCCAGCGTGTTTATG  
AGGGGTGCCACTTAATCTACCTGCGCTTGTGGTATGATGGCCACGTGGGTTCTG  
TGGTCCCCGCCATGAGCTTTGGATACAGCGCCTTGCACTGTGGGATTTTTGAACAA  
TATTGTGGTGTCTGTGCTGCAGTACTGTGCTGATTTAAGTGAGATCAGGGTGC GC  
TGCTGTGCCCGGAGGACAAGGCGTCTCATGCTGCGGGCGGTGCGAATCATCGCTG  
AGGAGACCACTGCCATGTTGTATTCTGCAGGACGGAGCGGCGGCGGCAGCAGT  
TTATTGCGCGCTGCTGCAGCACCACCGCCCTATCCTGATGCACGATTATGACTCT  
ACCCCATGTAGGCGTGGACTTCCCCTTCGCCGCCCGTTGAGCAACCGCAAGTTG  
GACAGCAGCCTGTGGCTCAGCAGCTGGACAGCGACATGAACTTAAGCGAGCTGC  
CCGGGGAGTTTATTAATATCACTGATGAGCGTTTGGCTCGACAGGAAACCGTGTG  
GAATATAACACCTAAGAATATGTCTGTTACCCATGATATGATGCTTTTTTAAGGCC  
AGCCGGGGAGAAAGGACTGTGTACTCTGTGTGTTGGGAGGGAGGTGGCAGGTTG  
AATACTAGGGTTCTGTGAGTTTGATTAAGGTACGGTGATCAATATAAGCTATGTG  
GTGGTGGGGCTATACTACTGAATGAAAAATGACTTGAAATTTTCTGCAATTGAAA  
AATAAACACGTTGAAACATAACATGCAACAGGTTACGATTCTTTATTCCTGGGC  
AATGTAGGAGAAGGTGTAAGAGTTGGTAGCAAAAGTTTCAGTGGTGTATTTTCCA  
CTTTCCAGGACCATGTAAAAGACATAGAGTAAGTGCTTACCTCGCTAGTTTCTG  
TGGATTCACTAGAATCGATGTAGGATGTTGCCCTCCTGACGCGGTAGGAGAAGG  
GGAGGGTGCCCTGCATGTCTGCCGCTGCTCTTGCTCTTGCCGCTGCTGAGGAGGG  
GGGCGCATCTGCCGAGCACCGGATGCATCTGGGAAAAGCAAAAAGGGGCTCG  
TCCCTGTTTCCGGAGGAATTTGCAAGCGGGTCTTG CATGACGGGGAGGCAAACC  
CCCGTTCGCCGAGTCCGGCCGGCCGAGACTCGAACC GGGGTCTGCGACTCA  
ACCCTTGAAAATAACCCTCCGGCTACAGGGAGCGAGCCACTTAATGCTTTCGCT

TTCCAGCCTAACCGCTTACGCCGCGCGCGGCCAGTGGCCAAAAAAGCTAGCGCA  
GCAGCCGCCGCGCCTGGAAGGAAGCCAAAAGGAGCGCTCCCCCGTTGTCTGACG  
TCGCACACCTGGGTTCGACACGCGGGCGGTAACCGCATGGATCACGGCGGACGG  
CCGGATCCGGGGTTCGAACCCCGGTTCGTCCGCCATGATACCCTTGCGAATTTATC  
CACCAGACCACGGAAGAGTGCCCGCTTACAGGCTCTCCTTTTGCACGGTCTAGAG  
CGTCAACGACTGCGCACGCCTCACCGGCCAGAGCGTCCCGACCATGGAGCACTTT  
TTGCCGCTGCGCAACATCTGGAACCGCGTCCGCGACTTTCCGCGCGCCTCCACCA  
CCGCCGCCGGCATCACCTGGATGTCCAGGTACATCTACGGATTACGTGACGTTT  
AAACCATATGATCAGCTCACTCAAAGGCGGTAATACGGTTATCCACAGAATCAG  
GGGATAACGCAGGAAAGAACATGTGAGCAAAGGCCAGCAAAGGCCAGGAAC  
CGTAAAAAGGCCGCGTTGCTGGCGTTTTTCCATAGGCTCCGCCCCCTGACGAGC  
ATCACAAAAATCGACGCTCAAGTCAGAGGTGGCGAAACCCGACAGGACTATAAA  
GATACCAGGCGTTTTCCCCCTGGAAGCTCCCTCGTGCGCTCTCTGTTCCGACCCTG  
CCGCTTACCGGATACCTGTCCGCCTTTCTCCCTTCGGGAAGCGTGGCGCTTTCTCA  
TAGCTCACGCTGTAGGTATCTCAGTTCGGTGTAGGTCGTTTCGCTCCAAGCTGGGC  
TGTGTGCACGAACCCCCCGTTCAGCCCGACCGCTGCGCCTTATCCGGTAACTATC  
GTCTTGAGTCCAACCCGGTAAGACACGACTTATCGCCACTGGCAGCAGCCACTGG  
TAACAGGATTAGCAGAGCGAGGTATGTAGGCGGTGCTACAGAGTCTTGAAGTG  
GTGGCCTAACTACGGCTACACTAGAAGAACAGTATTTGGTATCTGCGCTCTGCTG  
AAGCCAGTTACCTTCGGAAAAAGAGTTGGTAGCTCTTGATCCGGCAAACAAACC  
ACCGCTGGTAGCGGTGGTTTTTTTTGTTTGCAAGCAGCAGATTACGCGCAGAAAAA  
AAGGATCTCAAGAAGATCCTTTGATCTTTTCTACGGGGTCTGACGCTCAGTGGAA  
CGAAACTCACGTTAAGGGATTTTGGTCATGAGATTATCAAAAAGGATCTTCACC  
TAGATCCTTTTAAATTAATAAATGAAGTTTTAAATCAATCTAAAGTATATATGAGT  
AAACTTGGTCTGACAGTTACCAATGCTTAATCAGTGAGGCACCTATCTCAGCGAT  
CTGTCTATTTTCGTTTCATCCATAGTTGCCTGACTCCCCGTCGTGTAGATAACTACGA  
TACGGGAGGGCTTACCATCTGGCCCCAGTGCTGCAATGATACCAGCGAGACCCACG  
CTCACCGGCTCCAGATTTATCAGCAATAAACCAGCCAGCCGGAAGGGCCGAGCG  
CAGAAGTGGTCTGCAACTTTATCCGCCTCCATCCAGTCTATTAATTGTTGCCGGG  
AAGCTAGAGTAAGTAGTTCGCCAGTTAATAGTTTTCGCAACGTTGTTGCCATTGC  
TACAGGCATCGTGGTGTACGCTCGTCGTTTGGTATGGCTTCATTACGCTCCGGTT  
CCCAACGATCAAGGCGAGTTACATGATCCCCATGTTGTGCAAAAAAGCGGTTAG  
CTCCTTCGGTCTCCGATCGTTGTCAGAAGTAAGTTGGCCGCAGTGTTATCACTCA  
TGGTTATGGCAGCACTGCATAATTCTCTTACTGTCATGCCATCCGTAAGATGCTTT  
TCTGTGACTGGTGAAGTCAACCAAGTCATTCTGAGAATAGTGTATGCGGCGAC  
CGAGTTGCTCTTGCCCGGCGTCAATACGGGATAATACCAGCCACATAGCAGAAC  
TTTAAAAGTGCTCATCATTGGAAAACGTTCTTTCGGGGCGAAAACCTCTCAAGGATC  
TTACCGCTGTTGAGATCCAGTTCGATGTAACCCACTCGTGCACCCAAGTATCTTC  
AGCATCTTTTACTTTTACCAGCGTTTCTGGGTGAGCAAACAGGAAGGCAAAT  
GCCGCAAAAAAGGGAATAAGGGCGACACGGAAATGTTGAATACTCATACTCTTC  
CTTTTTCAATATTATTGAAGCATTATCAGGGTTATTGTCTCATGAGCGGATACAT  
ATTTGAATGTATTTAGAAAAATAAACAATAGGGGTTCCGCGCACATTTCCCCGA  
AAAGTGCCACCTAAATTGTAAGCGTTAATATTTTGTAAAATTCGCGTTAAATTTT  
TGTTAAATCAGCTCATTTTTTAACCAATAGGCCGAAATCGGCAAAATCCCTTATA  
AATCAAAAGAATAGACCGAGATAGGGTTGAGTGTGTTCCAGTTTGGAAACAAGA  
GTCCACTATTAAGAACGTGGACTCCAACGTCAAAGGGCGAAAAACCGTCTATC  
AGGGCGATGGCCACTACGTGAACCATCACCCATAATCAAGTTTTTTTGGGGTTCGAG  
GTGCCGTAAAGCACTAAATCGGAACCCTAAAGGGAGCCCCGATTTAGAGCTTG  
ACGGGGAAAGCCGGCGAACGTGGCGAGAAAGGAAGGGAAGAAAGCGAAAGGA  
GCGGGCGCTAGGGCGCTGGCAAGTGTAGCGGTCACGCTGCGCGTAACCACCACA  
CCCCCGCGCTTAATGCGCCGCTACAGGGCGCGATGGATCC
